# Supplementary material
Source: PubMed Central journal article supplement (PMC4401089)
Supplement: NIHMS651816-supplement-2.pdf [file NIHMS651816-supplement-2.pdf]

Supplementary Table S2. *P1* transcripts with wild type and mutant base pairs in the absence and presence of CCC.

| Base pair | -CCC | +CCC  | Base pair | -CCC | +CCC  | Base pair | -CCC | +CCC  |
|-----------|------|-------|-----------|------|-------|-----------|------|-------|
| +1A       | 1.00 | 13.85 | -9C       | 1.08 | 13.29 | -18G      | 0.89 | 11.24 |
| +1G       | 1.09 | 16.22 | -9T       | 1.01 | 12.29 | -18C      | 0.62 | 12.76 |
| +1C       | 0.70 | 3.86  | -9A       | 5.28 | 21.52 | -18A      | 1.27 | 13.63 |
| +1T       | 0.74 | 7.60  | -10G      | 0.35 | 11.70 | -19T      | 3.11 | 14.90 |
| -1G       | 0.60 | 4.94  | -10C      | 0.21 | 11.07 | -19A      | 2.13 | 14.86 |
| -1A       | 2.29 | 16.64 | -10A      | 0.67 | 12.83 | -19C      | 1.46 | 15.20 |
| -1T       | 1.36 | 13.86 | -11G      | 0.09 | 0.30  | -20G      | 1.23 | 12.94 |
| -2G       | 1.17 | 9.56  | -11C      | 0.03 | 0.17  | -20C      | 1.51 | 13.45 |
| -2C       | 1.15 | 12.49 | -11T      | 0.08 | 0.32  | -20A      | 1.79 | 12.35 |
| -2A       | 1.30 | 12.50 | -12G      | 0.13 | 5.18  | -21G      | 0.98 | 29.83 |
| -3G       | 1.48 | 10.39 | -12C      | 0.13 | 4.15  | -21C      | 1.04 | 36.02 |
| -3C       | 1.17 | 10.41 | -12A      | 0.10 | 4.34  | -21A      | 1.15 | 34.14 |
| -3A       | 1.08 | 6.87  | -13G      | 1.49 | 15.39 | -22G      | 1.25 | 18.24 |
| -4G       | 1.17 | 17.35 | -13T      | 1.32 | 17.20 | -22C      | 1.15 | 28.46 |
| -4C       | 1.24 | 12.93 | -13A      | 1.29 | 18.24 | -22A      | 1.01 | 21.53 |
| -4A       | 1.45 | 20.02 | -14A      | 0.38 | 6.40  | -23G      | 1.03 | 26.41 |
| -5G       | 0.99 | 12.75 | -14C      | 0.32 | 3.68  | -23A      | 0.91 | 19.53 |
| -5C       | 0.78 | 10.86 | -14T      | 0.32 | 8.20  | -23T      | 0.91 | 24.12 |
| -5T       | 0.80 | 13.41 | -15G      | 0.13 | 4.96  | -24G      | 0.83 | 13.70 |
| -6G       | 0.80 | 18.11 | -15C      | 0.33 | 9.44  | -24A      | 0.70 | 25.77 |
| -6C       | 1.01 | 19.08 | -15A      | 0.37 | 9.96  | -24C      | 0.77 | 21.57 |
| -6A       | 1.18 | 12.98 | -16G      | 0.89 | 17.08 | -25G      | 1.52 | 26.58 |
| -7G       | 0.20 | 4.03  | -16C      | 0.47 | 13.28 | -25C      | 1.65 | 14.81 |
| -7C       | 0.25 | 3.32  | -16T      | 0.28 | 9.57  | -25T      | 1.53 | 28.23 |
| -7A       | 0.34 | 6.56  | -17G      | 0.25 | 10.56 |           |      |       |
| -8C       | 3.74 | 11.95 | -17C      | 0.45 | 10.15 |           |      |       |
| -8T       | 1.29 | 30.36 | -17A      | 0.22 | 7.17  |           |      |       |
| -8A       | 6.65 | 21.92 |           |      |       |           |      |       |
